# Supplementary material for: Adsorption of ng L−1-level arsenic by ZIF-8 nanoparticles: application to the monitoring of environmental water
Source: Royal Society of Chemistry journal article supplement (doi:10.1039/c8ra07776b), 2018-01-01
Supplement: c8ra07776b1.pdf [file c8ra07776b1.pdf]

# 1 Adsorption of ng/L-level Arsenic by ZIF-8 Nanoparticles: Application for the Monitoring 2 of Environmental Water

3 Durga Parajuli<sup>a\*</sup>, Kiwamu Sue<sup>b</sup>, Akira Takahashi<sup>a</sup>, Hisashi Tanaka<sup>a</sup>, and Tohru Kawamoto<sup>a\*\*</sup>

4 <sup>a</sup>Nanomaterials Research Institute, National Institute of Advanced Industrial Science and  
5 Technology (AIST), 1-1-1 Higashi, Tsukuba, 305-8565, Japan

6 <sup>a</sup>Research Institute for Chemical Process Technology, National Institute of Advanced Industrial  
7 Science and Technology (AIST), 1-1-1 Higashi, Tsukuba, 305-8565, Japan

8

9 **Table S1.** The concentration of interfering foreign substances for colorimetric estimation of  
10 Arsenic using MQuant 117927.

| Concentrations of foreign substances in mg/l or % |      |                                |      |                                     |                   |
|---------------------------------------------------|------|--------------------------------|------|-------------------------------------|-------------------|
| Ag <sup>+</sup>                                   | 0.5  | Mg <sup>2+</sup>               | 1000 | EDTA                                | 1000              |
| Al <sup>3+</sup>                                  | 100  | MnO <sub>4</sub> <sup>-</sup>  | 500  | Free chlorine (hypochlorite)        | 250               |
| Ca <sup>2+</sup>                                  | 1000 | Na <sup>+</sup>                | 1000 | Polyethylene glycol                 | 10 <sup>(1)</sup> |
| Cl <sup>-</sup>                                   | 1000 | Ni <sup>2+</sup>               | 1    | Anionic surfactants <sup>(2)</sup>  | 1                 |
| CN <sup>-</sup>                                   | 500  | NO <sub>2</sub> <sup>-</sup>   | 100  | Cationic surfactants <sup>(3)</sup> | 0.1               |
| CO <sub>3</sub> <sup>2-</sup>                     | 100  | NO <sub>3</sub> <sup>-</sup>   | 100  | Nonionic surfactants <sup>(4)</sup> | 0.05              |
| CrO <sub>4</sub> <sup>2-</sup>                    | 250  | PO <sub>4</sub> <sup>3-</sup>  | 100  | NaCl                                | 20 %              |
| Cu <sup>2+</sup>                                  | 0.5  | S <sup>2-</sup>                | 2    |                                     |                   |
| F <sup>-</sup>                                    | 100  | Sb <sup>3+</sup>               | 1    |                                     |                   |
| Fe <sup>2+</sup>                                  | 500  | SeO <sub>3</sub> <sup>2-</sup> | 1    |                                     |                   |
| Fe <sup>3+</sup>                                  | 500  | SO <sub>3</sub> <sup>2-</sup>  | 2    |                                     |                   |
| K <sup>+</sup>                                    | 1000 | SO <sub>4</sub> <sup>2-</sup>  | 1000 |                                     |                   |

11

12

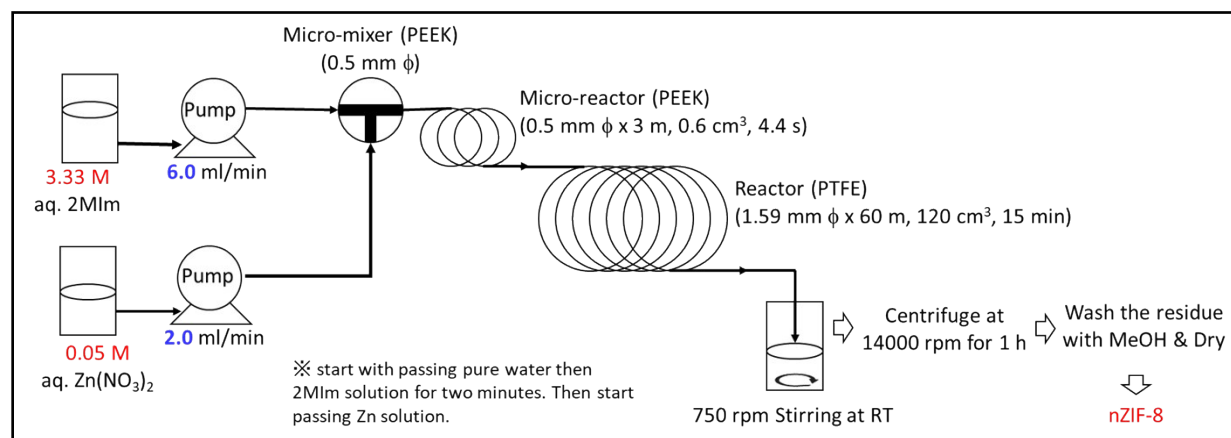

13

14 **Fig. S1.** Scheme showing the micromixing system used for the synthesis of nZIF-8 in flow.

15

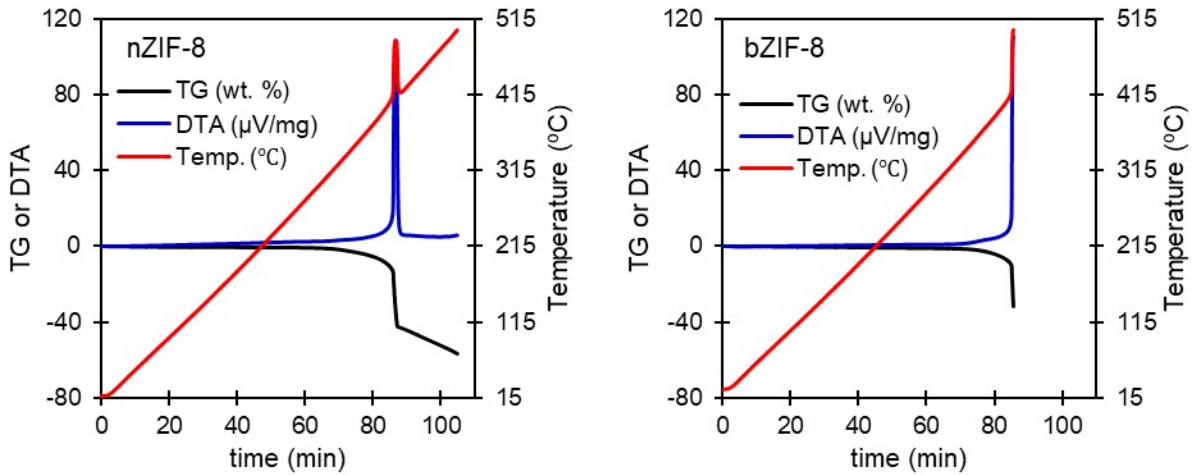

16

17 **Fig. S2.** TG-DTA profile of nZIF-8 and bZIF-8 taken in dry air condition show the exothermic  
 18 oxidation at 408 °C and 415 °C, respectively. Heating range: room temperature to 500 °C; rate: 5  
 19 °C/min, sample mass: 10 mg.

20

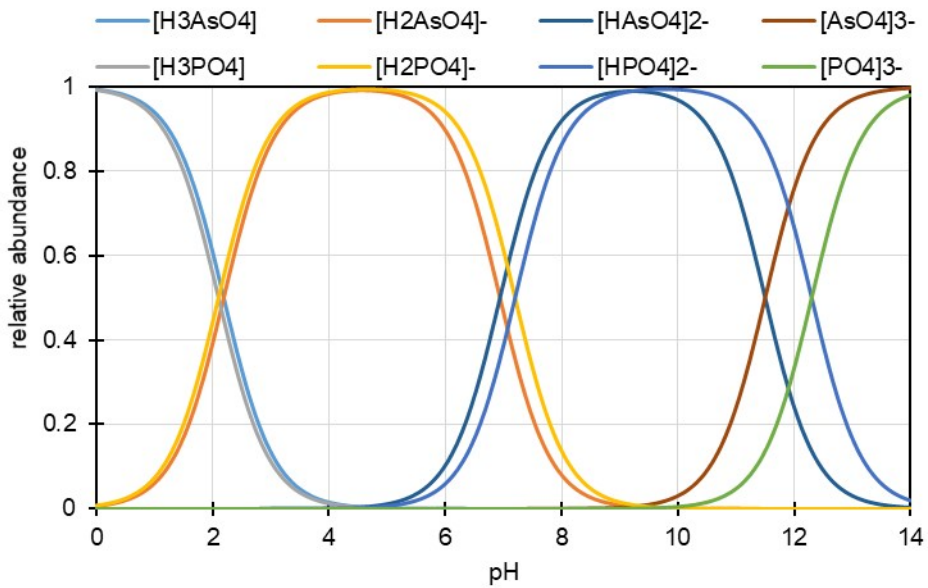

21

22 **Fig. S3.** Ion speciation diagram of  $\text{H}_3\text{AsO}_4$  and  $\text{H}_3\text{PO}_4$  with respect to pH.

23

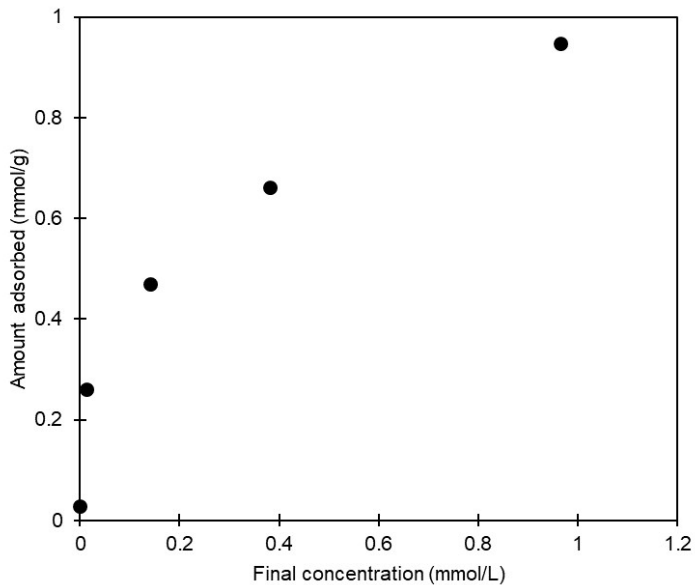

24

25 **Fig. S4.** Adsorption isotherm of  $\text{AsO}_4^{3-}$  onto nZIF-8. 10 mg nZIF-8 with 20 ml of 1-100 mg/L  
 26 solution mixed at 600 rpm for 1 h at 25 °C .

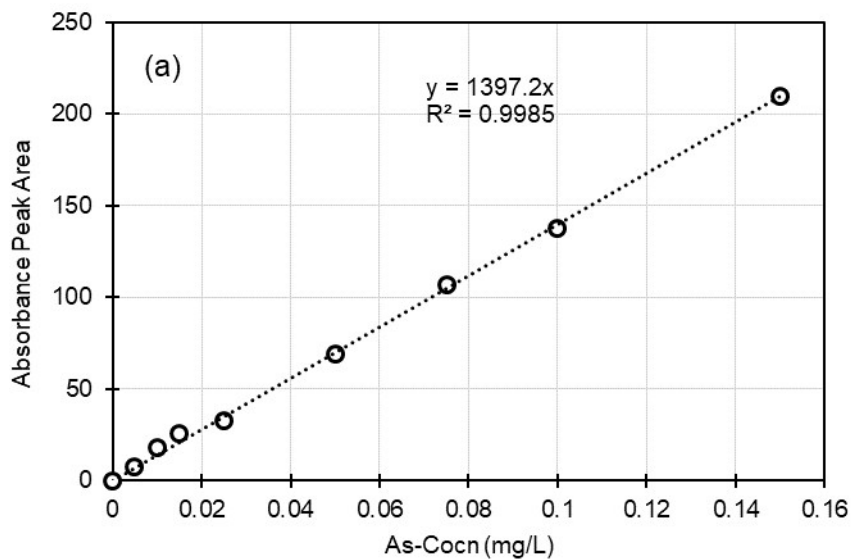

27

28

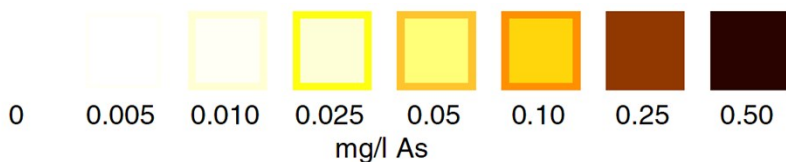

29 (b)

30 **Fig. S5.** (a) Graph showing linear correlation between the peak area (between 420 to 800 nm)  
 31 and Arsenic concentration between 0.005 to 0.15 mg/L range. (b) Color stripe of MQuant™.
